# Supplementary material
Source: publisher figshare collection journal article supplement (https://sage.figshare.com/ndownloader/files/19496711)
Supplement: Supplementary file 1 [file 19496711]

**Supp Table 1: Socio-demographic characteristics of women in the cohort by disability status.**

|                        |                                             | Any disability<br>(N=20,541) | No disability (N=36,787) |
|------------------------|---------------------------------------------|------------------------------|--------------------------|
| Age                    | Under 50                                    | 1,402 (6.8)                  | 4,267 (11.6)             |
|                        | 50-54                                       | 4,628 (22.5)                 | 11,376 (30.9)            |
|                        | 55-59                                       | 4,644 (22.6)                 | 8,634 (23.5)             |
|                        | 60-64                                       | 5,419 (26.4)                 | 7,509 (20.4)             |
|                        | 65-70                                       | 4,448 (21.7)                 | 5,001 (13.6)             |
| Marital Status         | Married                                     | 12,024 (58.5)                | 26,045 (70.8)            |
|                        | Separated/widowed/divorced                  | 1,820 (8.9)                  | 7,854 (21.4)             |
|                        | Single (never married)                      | 6,697 (32.6)                 | 2,888 (7.9)              |
| NSSEC                  | Managerial, administrative and professional | 4,092 (19.9)                 | 11,481 (31.2)            |
|                        | Intermediate                                | 3,277 (16.0)                 | 7,677 (20.9)             |
|                        | Own account                                 | 828 (4.0)                    | 2,255 (6.1)              |
|                        | Lower supervisory & technical               | 1,007 (4.9)                  | 1,350 (3.7)              |
|                        | Routine/semi-routine                        | 9,207 (44.8)                 | 12,282 (33.4)            |
|                        | Never worked/unemployed/FT student          | 2,130 (10.4)                 | 1,741 (4.7)              |
| Housing Tenure         | Owner                                       | 14,330 (69.8)                | 31,884 (86.7)            |
|                        | Private renter                              | 2,061 (10.0)                 | 2,317 (6.3)              |
|                        | Social renter                               | 4,150 (20.2)                 | 2,586 (7.0)              |
| Number of Cars         | Two or more                                 | 7,056 (34.4)                 | 20,538 (55.8)            |
|                        | One                                         | 8,883 (43.3)                 | 12,695 (34.5)            |
|                        | None                                        | 4,602 (22.4)                 | 3,554 (9.7)              |
| Educational Attainment | Degree or higher                            | 3,267 (15.9)                 | 10,064 (27.4)            |
|                        | Up to A-Level                               | 1,076 (5.2)                  | 2,892 (7.9)              |
|                        | Up to GCSE                                  | 4,360 (21.2)                 | 10,282 (28.0)            |
|                        | None                                        | 11,838 (57.6)                | 13,549 (36.8)            |
| Area of Residence      | Rest of Northern Ireland                    | 13,100 (63.8)                | 25,020 (68.0)            |
|                        | Belfast Metropolitan Area                   | 7,441 (36.2)                 | 11,767 (32.0)            |
